# Supplementary material
Source: PubMed Central journal article supplement (PMC3913304)
Supplement: Harden.pdf [file Harden.pdf]

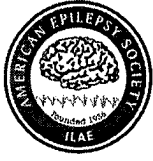

# American Epilepsy Society

## Epilepsy Currents Journal Disclosure of Potential Conflicts of Interest

### Section #1 Identifying Information

1. Today's Date: 1/13/2014
2. First Name Cynthia Last Name Harden Degree MD
3. Are you the Main Assigned Author?  Yes  No

If no, enter your name as co-author:

4. Manuscript/Article Title: ~~In Utero Valproate Exposure and Autism: Long suspected, finally proven~~
5. Journal Issue you are submitting for: ~~13.6~~ 14.1

### Section #2 The Work Under Consideration for Publication

Did you or your institution at any time receive payment or services from a third party for any aspect of the submitted work (including but not limited to grants, data monitoring board, study design, manuscript preparation, statistical analysis, etc.)?

Complete each row by checking "No" or providing the requested information. If you have more than one relationship just add rows to this table.

| Type                                                                                                                                    | No                                  | Money Paid to You | Money to Your Institution* | Name of Entity | Comments** |
|-----------------------------------------------------------------------------------------------------------------------------------------|-------------------------------------|-------------------|----------------------------|----------------|------------|
| 1. Grant                                                                                                                                | <input checked="" type="checkbox"/> |                   |                            | NIH/NINDS      |            |
| 2. Consulting fee or honorarium                                                                                                         | <input checked="" type="checkbox"/> |                   |                            |                |            |
| 3. Support for travel to meetings for the study or other purposes                                                                       | <input checked="" type="checkbox"/> |                   |                            |                |            |
| 4. Fees for participating in review activities such as data monitoring boards, statistical analysis, end point committees, and the like | <input checked="" type="checkbox"/> |                   |                            |                |            |
| 5. Payment for writing or reviewing the manuscript                                                                                      | <input checked="" type="checkbox"/> |                   |                            |                |            |
| 6. Provision of writing assistance, medicines, equipment, or administrative support.                                                    | <input checked="" type="checkbox"/> |                   |                            |                |            |
| 7. Other                                                                                                                                | <input type="checkbox"/>            |                   |                            |                |            |

\* This means money that your institution received for your efforts on this study.

\*\* Use this section to provide any needed explanation.

**Section #3 Relevant financial activities outside the submitted work.**

Place a check in the appropriate boxes in the table to indicate whether you have financial relationships (regardless of amount of compensation) with entities as described in the instructions. Use one line for each entity; add as many lines as you need by clicking the "Add" box. You should report relationships that were present during the 36 months prior to submission.

Complete each row by checking "No" or providing the requested information. If you have more than one relationship just add rows to this table.

| Type of relationship (in alphabetical order)                                  | No                                  | Money Paid to You | Money to Your Institution* | Name of Entity            | Comments** |
|-------------------------------------------------------------------------------|-------------------------------------|-------------------|----------------------------|---------------------------|------------|
| 1. Board membership                                                           | <input checked="" type="checkbox"/> |                   |                            |                           |            |
| 2. Consultancy                                                                | <input checked="" type="checkbox"/> | ✓                 |                            | <i>Upher Smith, Eisai</i> |            |
| 3. Employment                                                                 | <input checked="" type="checkbox"/> |                   |                            |                           |            |
| 4. Expert testimony                                                           | <input checked="" type="checkbox"/> |                   |                            |                           |            |
| 5. Grants/grants pending                                                      | <input checked="" type="checkbox"/> |                   |                            |                           |            |
| 6. Payment for lectures including service on speakers bureaus                 | <input type="checkbox"/>            | yes               |                            | UCB, Glaxo, Lundbeck      |            |
| 7. Payment for manuscript preparation.                                        | <input checked="" type="checkbox"/> |                   |                            |                           |            |
| 8. Patents (planned, pending or issued)                                       | <input checked="" type="checkbox"/> |                   |                            |                           |            |
| 9. Royalties                                                                  | <input checked="" type="checkbox"/> |                   |                            |                           |            |
| 10. Payment for development of educational presentations                      | <input checked="" type="checkbox"/> |                   |                            |                           |            |
| 11. Stock/s tock options                                                      | <input checked="" type="checkbox"/> |                   |                            |                           |            |
| 12. Travel/accom modations/meeting expenses unrelated to activities listed.** | <input checked="" type="checkbox"/> |                   |                            |                           |            |
| 13. Other (err on the side of full disclosure)                                | <input checked="" type="checkbox"/> |                   |                            |                           |            |

\* This means money that your institution received for your efforts.

\*\* For example, if you report a consultancy above there is no need to report travel related to that consultancy on this line.

**Section #4 Other relationships**

Are there other relationships or activities that readers could perceive to have influenced, or that give the appearance of potentially influencing, what you wrote in the submitted work?

No other relationships/conditions/circumstances that present a potential conflict of interest.

Yes, the following relationships/conditions/circumstances are present:

Speaker's Bureau for Glaxo

Thank you for your assistance.  
Epilepsy Currents Editorial Board
